# Supplementary material for: Identification of an Epigenetically Marked Locus within the Sex Determination Region of Channel Catfish
Source: MDPI journal article supplement (doi:10.3390/ijms23105471), 2022-05-13
Supplement: s1 [file s1]

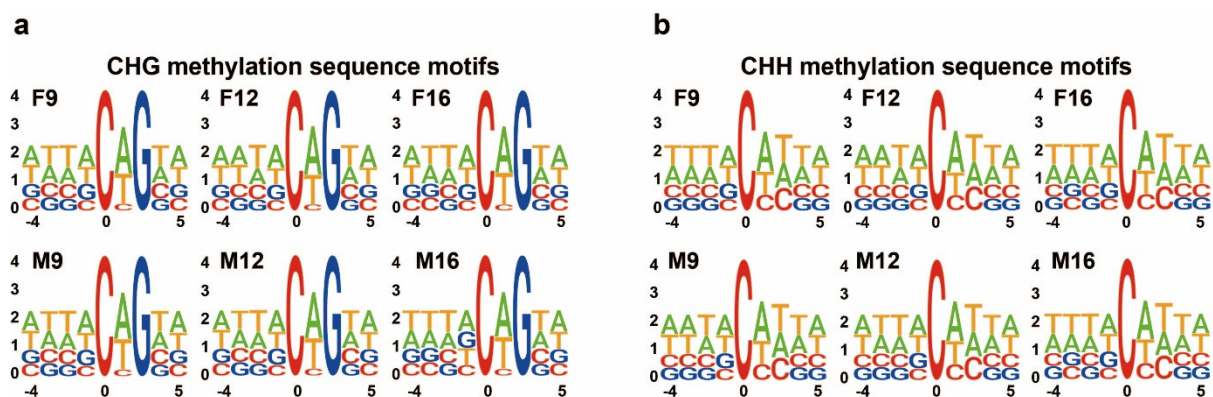

**Supplementary Figure S1.** The methylation sequence motifs of CHG and CHH in two sexes of channel catfish at 9, 12, and 16 dpf.

### Hypermethylated genes in female

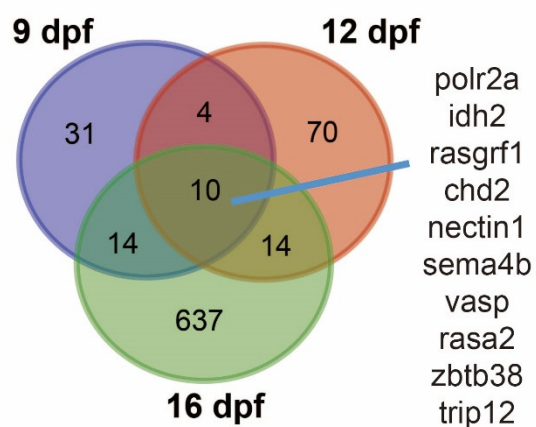

### Hypermethylated genes in male

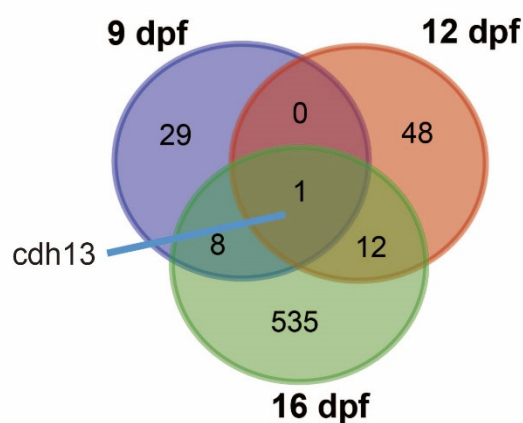

**Supplementary Figure S2.** The number of hypermethylated genes in females or males at 9, 12, and 16 dpf in females and males. 10 genes (polr2a, idh2, rasgrf1, chd2, nectin1, sema4b, vasp, rasa2, zbtb38, and trip12) were hypermethylated in females at all three timepoints of 9, 12, and 16 dpf, and one gene, cdh13, was hypermethylated in males at all three timepoints of 9, 12, and 16 dpf.

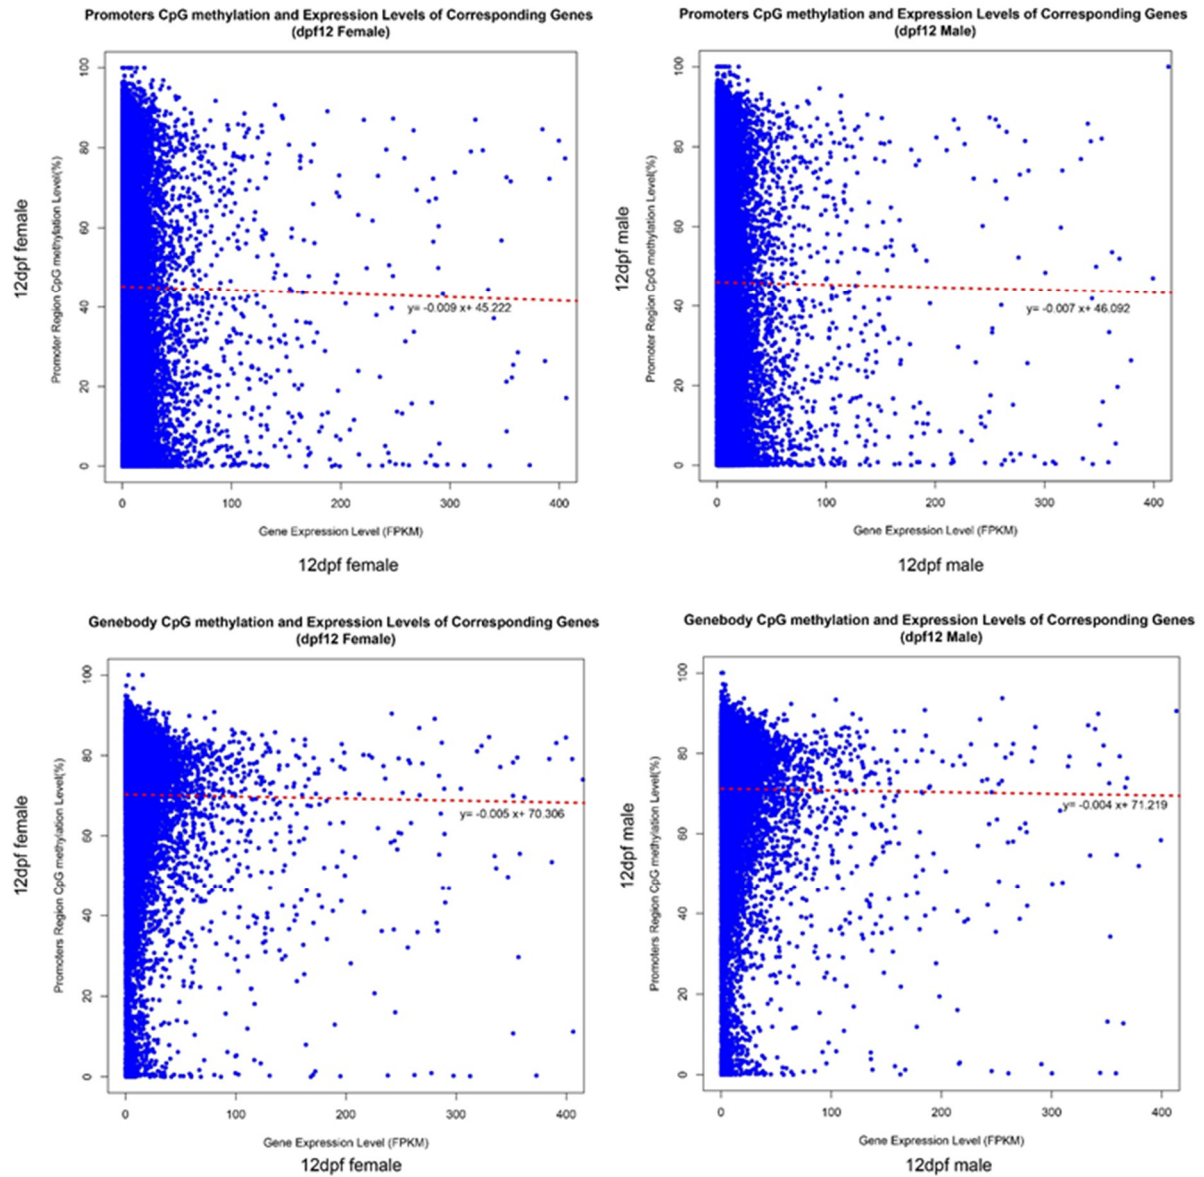

**Supplementary Figure S3.** Correlation between CpG methylation levels (promoter and gene body) and respective gene expression levels in channel catfish.

**Supplementary Table S2.** Differentially methylated genes between genetic females and males in the sex determination region of channel catfish, *Ictalurus punctatus*. Blue shade “+” represents that the gene was differentially methylated between genetic females and males.

| Gene         | 9 dpf | 12 dpf | 16 dpf |
|--------------|-------|--------|--------|
| polr2a       | +     | +      | +      |
| idh2         | +     | +      | +      |
| rasgrf1      | +     | +      | +      |
| chd2         | +     | +      | +      |
| nectin1      | +     | +      | +      |
| sema4b       | +     | +      | +      |
| vasp         | +     | +      | +      |
| rasa2        | +     | +      | +      |
| zbtb38       | +     | +      | +      |
| trip12       | +     | +      | +      |
| LOC108264027 | +     | +      |        |
| LOC108264215 | +     | +      |        |
| shank2       | +     | +      |        |
| cdon         | +     |        | +      |
| sptbn4       | +     |        | +      |
| pik3c2a      | +     |        | +      |
| sphkap       | +     |        | +      |
| pdc10        | +     |        | +      |
| LOC108264720 | +     |        | +      |
| prdm10       | +     |        | +      |
| ddx6         |       | +      | +      |
| LOC108263952 |       | +      | +      |
| gtf2ird2b    |       | +      | +      |
| LOC108264255 |       | +      | +      |
| pid1         |       | +      | +      |
| sertad3      |       | +      | +      |
| reln         |       | +      | +      |
| LOC108264017 |       | +      | +      |
| gnao1        |       | +      | +      |
| cipc         |       | +      | +      |
| dhx34        |       | +      | +      |
| sec11a       | +     |        |        |
| LOC108264030 | +     |        |        |
| esrrg        | +     |        |        |
| LOC108263945 |       | +      |        |
| shkbp1       |       | +      |        |
| LOC108264264 |       | +      |        |
| LOC108264015 |       | +      |        |
| LOC108264022 |       | +      |        |
| st14         |       | +      |        |
| hydin-l2     |       | +      |        |
| slc28a2      |       |        | +      |

|              |  |  |   |
|--------------|--|--|---|
| LOC108264806 |  |  | + |
| LOC108264221 |  |  | + |
| hsf4         |  |  | + |
| prx          |  |  | + |
| LOC108264443 |  |  | + |
| fan1         |  |  | + |
| tnmem170a    |  |  | + |
| aplp2        |  |  | + |
| LOC108264200 |  |  | + |
| fam65a       |  |  | + |
| nrn1l        |  |  | + |
| dner         |  |  | + |
| spred1       |  |  | + |
| carmil2      |  |  | + |
| akt2         |  |  | + |
| blm          |  |  | + |
| lmo2         |  |  | + |
| ranbp10      |  |  | + |
| bcl9l        |  |  | + |
| pard6a       |  |  | + |
| treh         |  |  | + |
| araf         |  |  | + |
| LOC108264345 |  |  | + |
| cfdp1        |  |  | + |
| napa         |  |  | + |
| slco3a1      |  |  | + |
| daw1         |  |  | + |
| LOC108263932 |  |  | + |
| LOC108264718 |  |  | + |
| mef2a        |  |  | + |
| LOC108264019 |  |  | + |
| cbfb         |  |  | + |
| nlrc3        |  |  | + |
| irf2bp1      |  |  | + |
| bcar1        |  |  | + |
| pskh1        |  |  | + |
| necab2       |  |  | + |
| LOC108264797 |  |  | + |
| nutf2        |  |  | + |
| LOC108264373 |  |  | + |
| mbtps1       |  |  | + |
| polr2i       |  |  | + |
| golim4       |  |  | + |
| srpra        |  |  | + |
| ppfia1       |  |  | + |
| ctcf         |  |  | + |

|              |           |           |           |
|--------------|-----------|-----------|-----------|
| pik3c2a      |           |           | +         |
| st14         |           |           | +         |
| <b>Total</b> | <b>23</b> | <b>31</b> | <b>77</b> |

**Supplementary Table S4.** Distribution of differentially expressed genes between genetic females and males at 7, 12, and 17 dpf across the 29 chromosomes of channel catfish, *Ictalurus punctatus*.

| Chromosome   | Number of differentially expressed genes |            |            |
|--------------|------------------------------------------|------------|------------|
|              | 7dpf                                     | 12dpf      | 17dpf      |
| Chr 1        | 4                                        | 5          | 17         |
| Chr 2        | 1                                        | 1          | 14         |
| Chr 3        | 1                                        | 4          | 14         |
| Chr 4        | 8                                        | 7          | 14         |
| Chr 5        | 0                                        | 5          | 14         |
| Chr 6        | 1                                        | 6          | 12         |
| Chr 7        | 3                                        | 4          | 8          |
| Chr 8        | 1                                        | 1          | 9          |
| Chr 9        | 0                                        | 2          | 10         |
| Chr 10       | 1                                        | 8          | 8          |
| Chr 11       | 0                                        | 6          | 6          |
| Chr 12       | 4                                        | 8          | 13         |
| Chr 13       | 0                                        | 7          | 13         |
| Chr 14       | 1                                        | 2          | 10         |
| Chr 15       | 1                                        | 7          | 8          |
| Chr 16       | 3                                        | 2          | 13         |
| Chr 17       | 0                                        | 4          | 12         |
| Chr 18       | 1                                        | 4          | 17         |
| Chr 19       | 1                                        | 0          | 7          |
| Chr 20       | 1                                        | 6          | 9          |
| Chr 21       | 3                                        | 8          | 6          |
| Chr 22       | 1                                        | 1          | 7          |
| Chr 23       | 0                                        | 5          | 6          |
| Chr 24       | 2                                        | 0          | 8          |
| Chr 25       | 1                                        | 1          | 9          |
| Chr 26       | 4                                        | 3          | 12         |
| Chr 27       | 2                                        | 2          | 6          |
| Chr 28       | 1                                        | 0          | 5          |
| Chr 29       | 0                                        | 3          | 13         |
| <b>Total</b> | <b>46</b>                                | <b>112</b> | <b>300</b> |

**Supplementary Table S5.** Differentially expressed and methylated genes outside of SDR region during critical period of sex determination in channel catfish.

| Gene         | chr   | Differential expression<br>FPKM male / FPKM female |       |       | Differentially methylation<br>Female / Male |         |         |
|--------------|-------|----------------------------------------------------|-------|-------|---------------------------------------------|---------|---------|
|              |       | 7d                                                 | 12d   | 17d   | 9d                                          | 12d     | 16d     |
| slc12a3      | chr4  | nd                                                 | nd    | 2.90  | nd                                          | ♂ Hyper | ♂ Hyper |
| lct1         | chr4  | nd                                                 | nd    | 2.17  | nd                                          | ♂ Hyper | nd      |
| asz1         | chr4  | nd                                                 | nd    | 2.04  | nd                                          | nd      | ♀ Hyper |
| si           | chr4  | nd                                                 | -2.72 | nd    | nd                                          | nd      | ♂ Hyper |
| LOC108263970 | chr4  | nd                                                 | -4.01 | -2.65 | nd                                          | nd      | ♂ Hyper |
| cpb1         | chr1  | nd                                                 | nd    | 2.92  | nd                                          | nd      | ♂ Hyper |
| frem3        | chr3  | nd                                                 | nd    | 2.09  | nd                                          | nd      | ♀ Hyper |
| kcnk12       | chr3  | nd                                                 | nd    | -2.67 | nd                                          | nd      | ♀ Hyper |
| upp2         | chr6  | nd                                                 | nd    | -2.13 | nd                                          | ♀ Hyper | nd      |
| plb1         | chr9  | nd                                                 | -2.27 | nd    | nd                                          | nd      | ♀ Hyper |
| LOC108273626 | chr13 | nd                                                 | nd    | 2.01  | nd                                          | nd      | ♀ Hyper |
| spg20        | chr16 | nd                                                 | nd    | 2.04  | nd                                          | nd      | ♂ Hyper |
| mmp13        | chr16 | -2.08                                              | nd    | nd    | nd                                          | nd      | ♂ Hyper |
| cfap77       | chr22 | nd                                                 | nd    | 2.06  | nd                                          | nd      | ♀ Hyper |
| ptprh        | chr23 | nd                                                 | -2.05 | nd    | ♀ Hyper                                     | nd      | nd      |
